# Supplementary material
Source: publisher figshare collection journal article supplement (https://wiley.figshare.com/ndownloader/files/5583071)
Supplement: Supplementary file 1 [file 5583071]

VEGPROD	SITE	LNVEGPROD	WT
9	1	2.197224577	1.46039512
9	1	2.197224577	1.46039512
10	1	2.302585093	1.46039512
11	1	2.397895273	1.46039512
12	1	2.48490665	1.46039512
12	1	2.48490665	1.46039512
13	1	2.564949358	1.46039512
14	1	2.63905733	1.46039512
17	1	2.833213344	1.46039512
19	1	2.944438979	1.46039512
20	1	2.995732274	1.46039512
21	1	3.044522438	1.46039512
21	1	3.044522438	1.46039512
22	1	3.091042453	1.46039512
22	1	3.091042453	1.46039512
23	1	3.135494216	1.46039512
26	1	3.258096538	1.46039512
27	1	3.295836866	1.46039512
27	1	3.295836866	1.46039512
28	1	3.33220451	1.46039512
28	1	3.33220451	1.46039512
29	1	3.36729583	1.46039512
31	1	3.433987205	1.46039512
32	1	3.465735903	1.46039512
35	1	3.555348062	1.46039512
35	1	3.555348062	1.46039512
36	1	3.583518939	1.46039512
36	1	3.583518939	1.46039512
36	1	3.583518939	1.46039512
37	1	3.610917913	1.46039512
42	1	3.737669618	1.46039512
43	1	3.761200116	1.46039512
48	1	3.871201011	1.46039512
48	1	3.871201011	1.46039512
48	1	3.871201011	1.46039512
50	1	3.912023005	1.46039512
51	1	3.931825633	1.46039512
51	1	3.931825633	1.46039512
52	1	3.951243719	1.46039512
55	1	4.007333185	1.46039512
58	1	4.060443011	1.46039512
63	1	4.143134726	1.46039512
65	1	4.17438727	1.46039512
70	1	4.248495242	1.46039512
76	1	4.33073334	1.46039512
83	1	4.418840608	1.46039512
96	1	4.564348192	1.46039512
97	1	4.574710979	1.46039512
102	1	4.624972813	1.46039512
173	1	5.153291595	1.46039512
16	0	2.772588722	2.396433104
18	0	2.890371758	2.396433104
25	0	3.218875825	2.396433104
27	0	3.295836866	2.396433104
29	0	3.36729583	2.396433104
30	0	3.401197382	2.396433104
31	0	3.433987205	2.396433104
31	0	3.433987205	2.396433104
34	0	3.526360525	2.396433104
36	0	3.583518939	2.396433104
47	0	3.850147602	2.396433104
51	0	3.931825633	2.396433104
52	0	3.951243719	2.396433104
58	0	4.060443011	2.396433104
70	0	4.248495242	2.396433104
